# Supplementary material for: A flow cytometry method for quantitative measurement and molecular investigation of the adhesion of bacteria to yeast cells
Source: PubMed Central journal article supplement — Sci Rep. 2024 Sep 9;14:20935. doi: 10.1038/s41598-024-72030-w (PMC11385505; doi:10.1038/s41598-024-72030-w), 2024-09-09

**A flow cytometry method for quantitative measurement and molecular investigation of the  
adhesion of bacteria to yeast cells.**

Marion Schiavone<sup>1,2§</sup>, Adilya Dagkesamanskaya<sup>1§</sup>, Pierre-Gilles Vieu<sup>1</sup>, Maëlle Duperray<sup>1</sup>, Valérie Duplan-Eche<sup>3</sup>,

Jean Marie François<sup>1\*</sup>

<sup>1</sup>Toulouse Biotechnology Institute (TBI), UMR INSA-CNRS 5504 & INRA 792, 135 avenue de Rangeuil,  
F-31077 Toulouse, France.

<sup>2</sup>Lallemand SAS, 19, rue des briquetiers, 31702 Blagnac, France

<sup>3</sup>Institut Toulousain des Maladies Infectieuses et Inflammatoires (Infinity), CNRS U5051, INSERM U1291,  
University Toulouse III, F-31000 Toulouse, France

Email address of the authors:

§Marion Schiavone: [schiavon@insa-toulouse.fr](mailto:schiavon@insa-toulouse.fr)

§Adilya Dagkesamanskaya [dagkesam@insa-toulouse.fr](mailto:dagkesam@insa-toulouse.fr)

Pierre-Giles Vieu [pvieu@insa-toulouse.fr](mailto:pvieu@insa-toulouse.fr)

Maëlle Duperray [duperray@insa-toulouse.fr](mailto:duperray@insa-toulouse.fr)

Valérie Duplan-Eche [valerie.duplan@inserm.fr](mailto:valerie.duplan@inserm.fr)

\*Jean Marie François : [fran\\_jm@insa-toulouse.fr](mailto:fran_jm@insa-toulouse.fr)

**§ co-authors: equal contribution**

\*Corresponding authors

**Short title:** Flow cytometry to study bacteria-yeast interaction

**Key words:** *Yeast, bacteria, adhesion, cell wall, fimbriae, flow cytometry*

## Supplementary Information Supplementary Figures

**Figure S1: Yeast singlets isolation.** Single yeast population with similar cell size and granularity was selected based on the FSC-Area vs FSC-Height plot

Figure S1 (Schiavone-Dagkesamanskaya et al.)

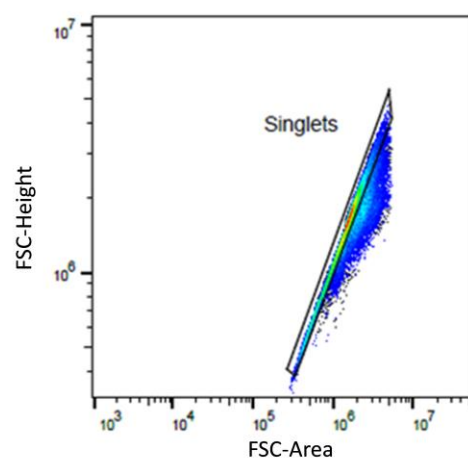

**Figure S2: Effect of washing and preincubation time on adhesion of bacteria to yeast –(A).** Different amount of fluorescent E22 cells were mixed and incubated with yeast BY4741  $10^8$  cells for 60 min in PBS at  $37^\circ\text{C}$ . Successive washings were done with 1 ml of PBS, cells were centrifuged and then resuspended in PBS and fluorescence was measured after each washing. (B)  $10^9$  cells of bacteria E22 fluorescent strain were mixed with yeast BY4741  $10^8$  cells and incubated at  $37^\circ\text{C}$  for different time period. Fluorescence was measured after 2 washes in PBS.

Figure S2 (Schiavone-Dagkesamanskaya et al.)

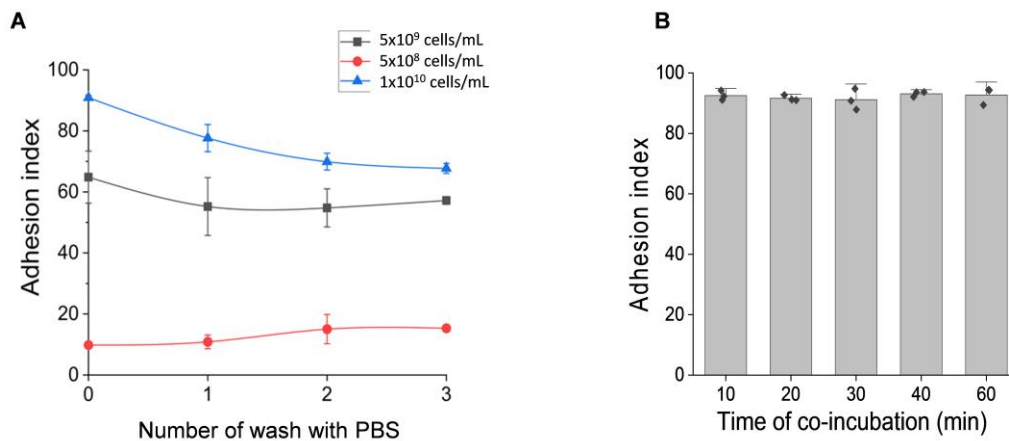

**Figure S3: Importance of yeast cell aggregates removing for quantification of bacteria adhesion.** Flow cytometer plots(A) and calculated AI(B) of *E. coli* interaction with sonicated and non-sonicated yeast *gas1* mutant cells. The mean  $\pm$  sdv and individual results of 3 independent experiments are shown.

\*Shows significance difference at  $p < 0.05$  by One-way ANOVA with Fischer post-test compared to the wildtype strain BY4741 (WT).

Figure S3 (Schiavone-Dagkesamanskaya et al.)

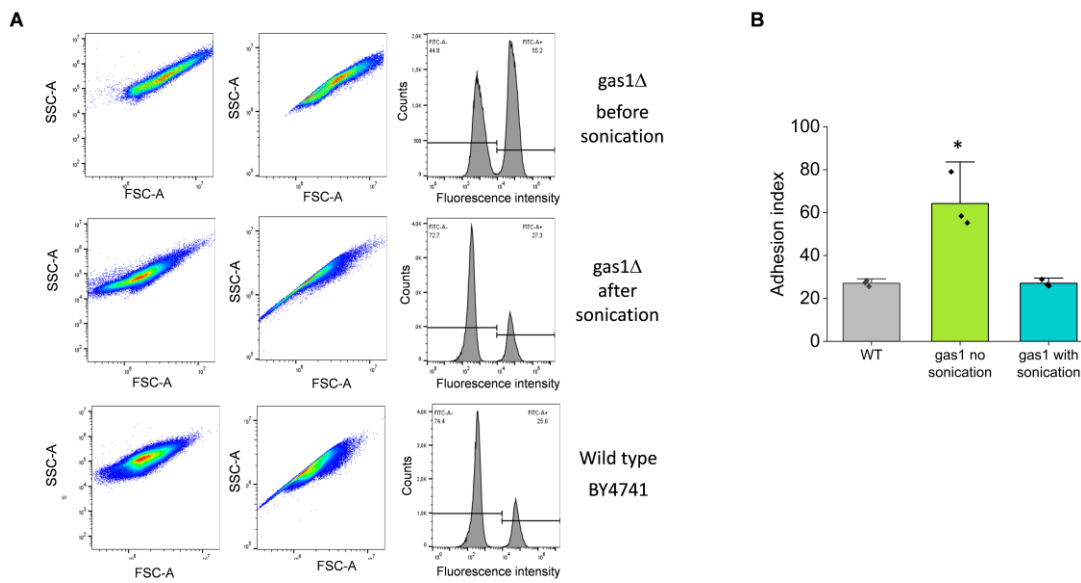

**Figure S4. The adhesion of *E. coli* to yeast is barely affected by pH, temperature and ionic strength.** Adhesion index for yeast-*E. coli* at different pH (A), different temperature(B) and different salt concentration(C). For the temperature and pH comparison experiments (A and B),  $1 \times 10^8$  fluorescent *E. coli* E22 cells were mixed with  $10^8$  BY4741 yeast cells in 1 ml for 90 min at 37°C. For salt concentration studies,  $10^9$  cells of E22 strain were mixed with  $10^8$  yeast cells. The mean  $\pm$  sdv and individual results of 3 independent experiments are shown. **P-values are indicated.**

Figure S4 (Schiavone-Dagkesamanskaya et al.)

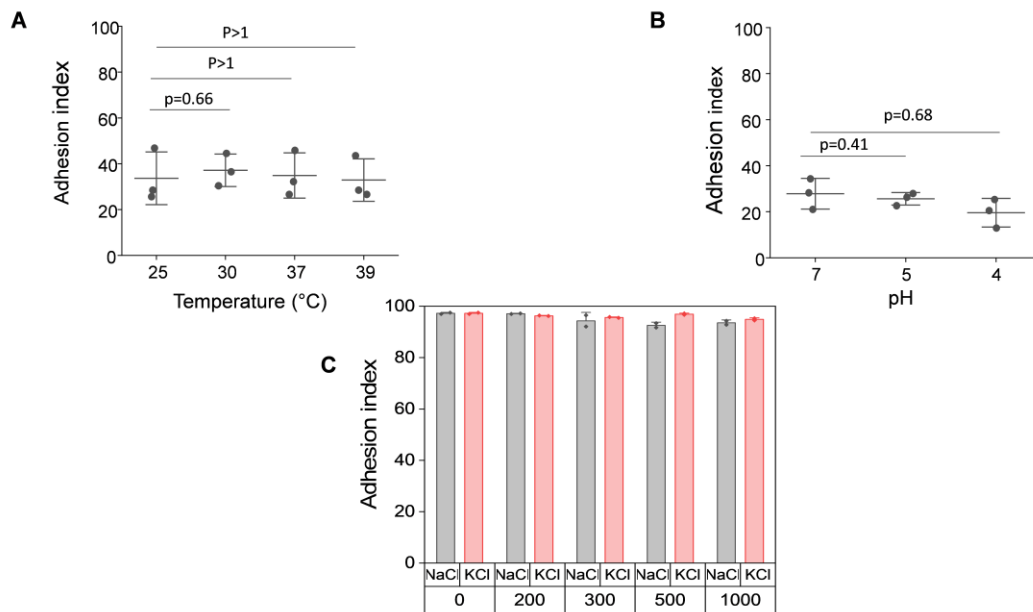

**Figure S5. Low adhesion of *fimA*, *fimH* mutants is not stable.** Adhesion of control strain was carried out with a mix of  $10^7$  cells fluorescent BW25113 with  $10^8$  cells yeast BY4741. In case of *fimH* and *fimA* mutants  $10^9$  cells were added for interaction (Ai 1,3,5 columns) Additional wash with PBS after the first measurement removed completely bound mutant cells and didn't affect the WT (2,4,6).

Figure S5 (Schiavone-Dagkesamansky et al.)

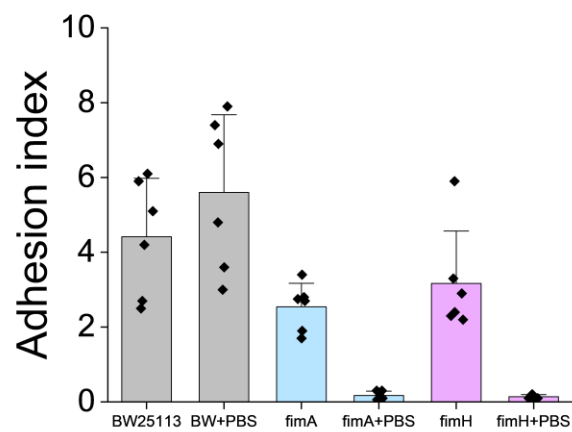

**Figure S6: Effect of addition of excess of mannosyl-sugars to the adhesion of bacteria to yeast cells**

Adhesion was carried out with a mix of  $10^9$  fluorescent *E. coli* E22 cells/ml with  $10^8$  yeast BY4741/ml incubated for 90 min at 37°C. After two quick washes with 1 ml of PBS, the mix was centrifuged and then the pellet was resuspended either in 1 ml PBS or in 1 ml of PBS containing 1 M Methyl mannose (MeMan) for 30 min at 37°C prior to be analyzed for the fluorescence by flow cytometry. Results shown are the mean of 2 independent experiments.

Figure S6 (Schiavone-Dagkesamanskaya et al.)

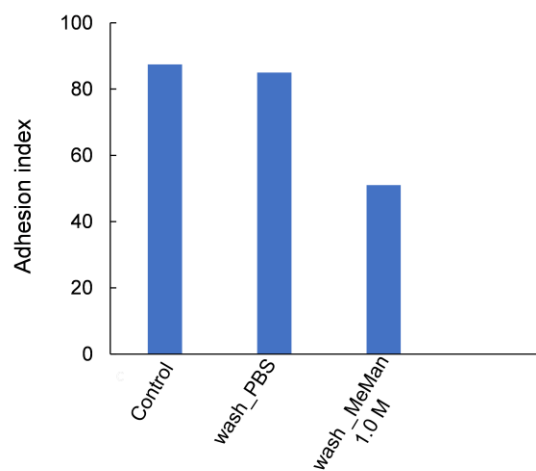

Supplement: 41598_2024_72030_MOESM1_ESM.pdf [file 41598_2024_72030_MOESM1_ESM.pdf]
